# Supplementary material for: Climate information preserved in seasonal water isotope at NEEM: relationships with temperature, circulation and sea ice
Source: Copernicus journal article supplement (doi:10.5194/cp-14-1067-2018), 2018-07-20
Supplement: Supplementary file 1 [file cp-14-1067-2018-supplement.pdf]

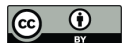

## *Supplement of*

# **Climate information preserved in seasonal water isotope at NEEM: relationships with temperature, circulation and sea ice**

**Minjie Zheng et al.**

*Correspondence to:* Minjie Zheng ([minjie.zheng@geol.lu.se](mailto:minjie.zheng@geol.lu.se)) and Jesper Sjolte ([jesper.sjolte@geol.lu.se](mailto:jesper.sjolte@geol.lu.se))

The copyright of individual parts of the supplement might differ from the CC BY 4.0 License.

Figure S1. Correlations between the SW Greenland temperature record and NEEM summer  $\delta^{18}\text{O}$  (a) and NEEM winter  $\delta^{18}\text{O}$  (b) for variously defined choices of seasonal centered fraction of year in the ice core data. Correlations are calculated for period 1949-2004. The 95% confidence level is marked as dashed line (T-test).

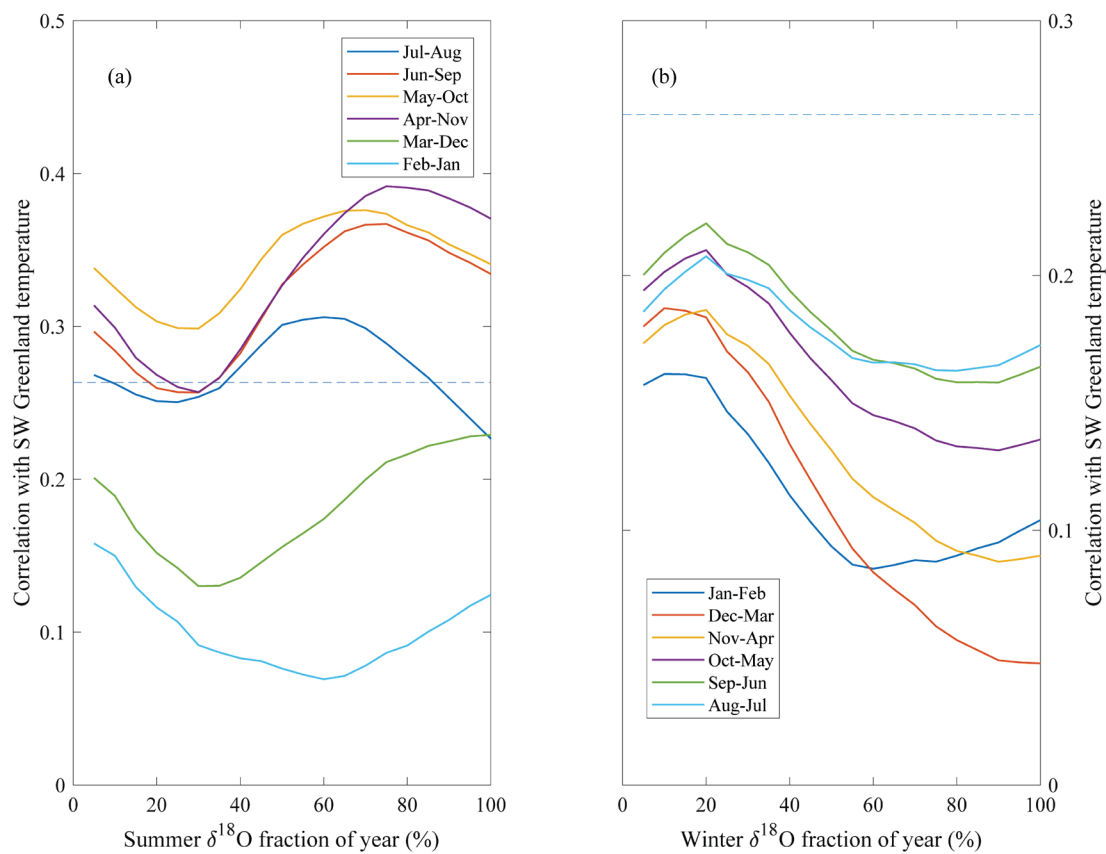

Figure S2. An example of dating and definition of summer and winter seasons in the NEEM08S2 ice core based on a 70% summer and 30% winter deposit fraction center on the appropriate season. The dashed lines are the depth of the onset of annual layers defined by Masson-Delmotte et al.,(2015). The dotted lines are the depth where  $\delta^{18}\text{O}$  reaches the maxima within the year.

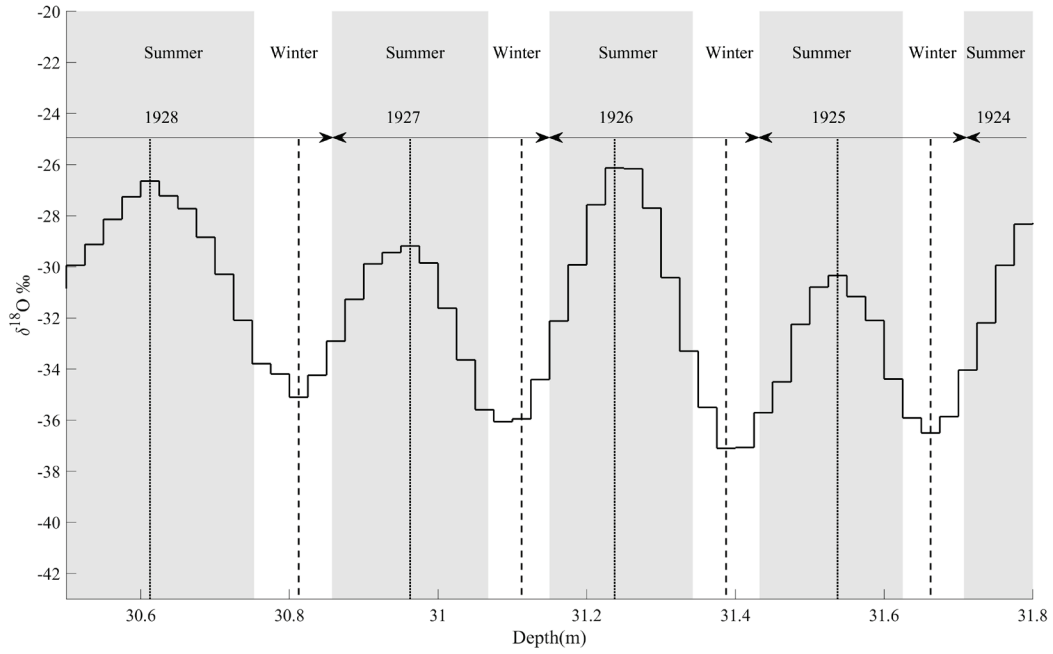

Figure S3. The spatial correlation maps between seasonal NEEM  $\delta^{18}\text{O}$  signal and SAT for two subperiods (1855-1930 & 1931-2004). The red solid lines mark the significant correlations at 95% confidence level. (T-test)

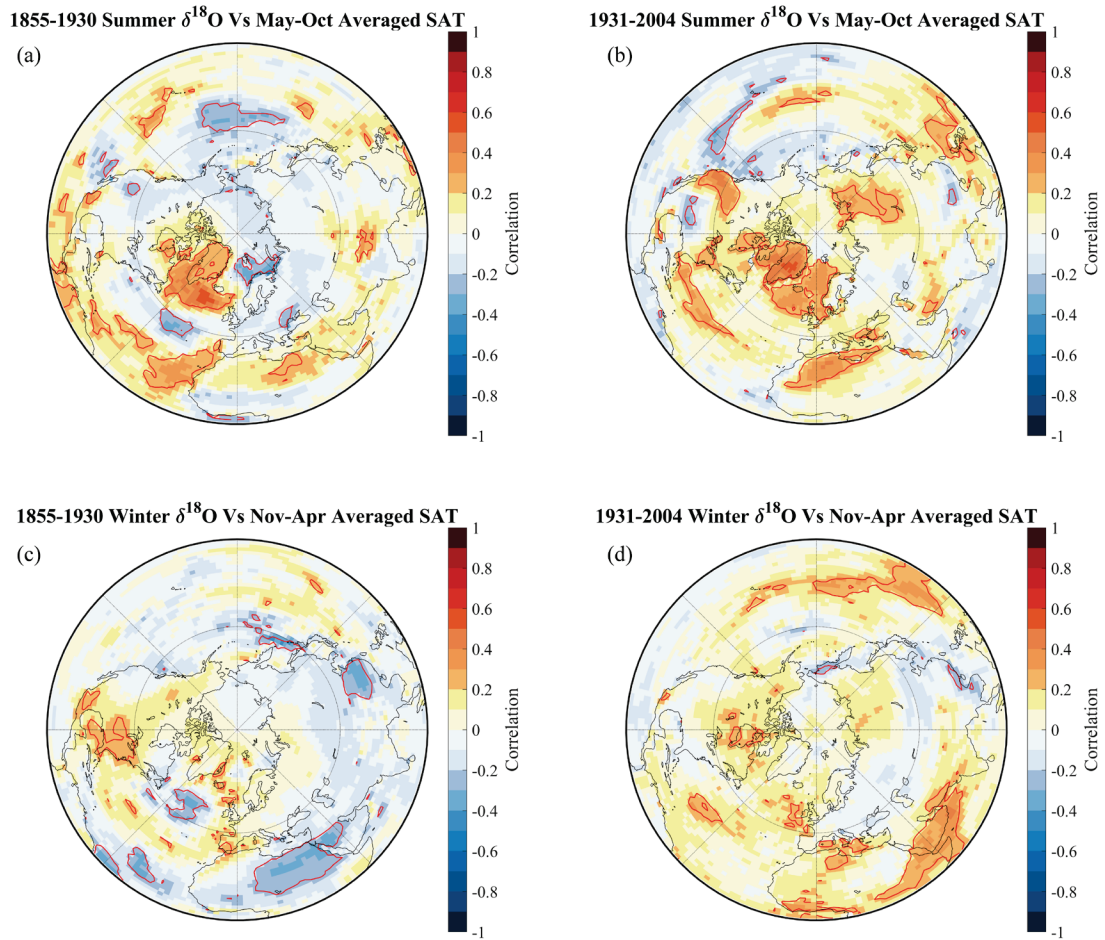

Figure S4. The same as Fig. S3 but showing the relationships with SLP from 20CR reanalysis data. The red solid lines mark the significant correlations at 95% confidence level. (T-test)

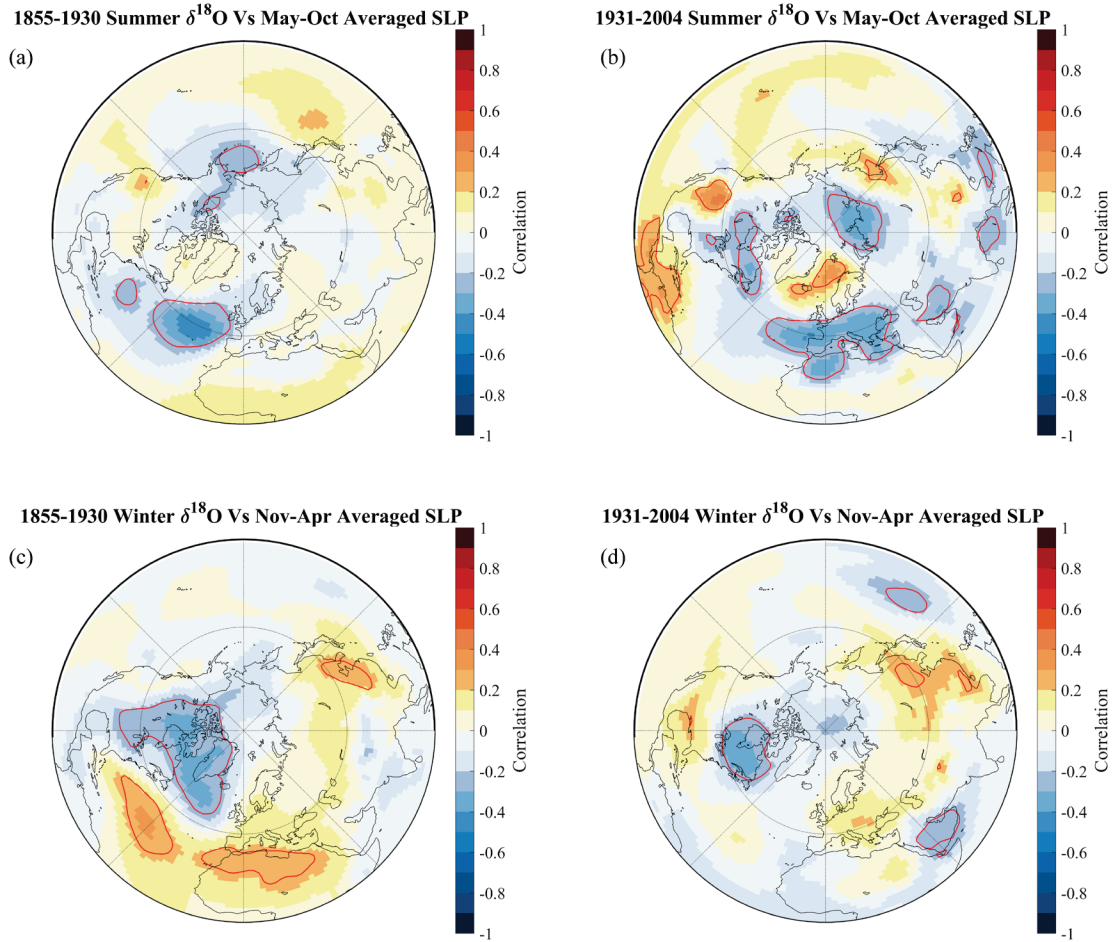

Masson-Delmotte, V., H. C. Steen-Larsen, P. Ortega, D. Swingedouw, T. Popp, B. M. Vinther, H. Oerter, A. E. Sveinbjornsdottir, H. Gudlaugsdottir, J. E. Box, S. Falourd, X. Fettweis, H. Gallée, E. Garnier, V. Gkinis, J. Jouzel, A. Landais, B. Minster, N. Paradis, A. Orsi, C. Risi, M. Werner, and J. W. C. White. 2015. 'Recent changes in north-west Greenland climate documented by NEEM shallow ice core data and simulations, and implications for past-temperature reconstructions', *The Cryosphere*, 9: 1481-504.
